# Supplementary material for: BeN4 nanoribbon-based 3D porous metallic and ductile monolith for high-performance sodium-ion battery anode
Source: Royal Society of Chemistry journal article supplement (doi:10.1039/d3ta06607j), 2023-12-16
Supplement: d3ta06607j1.pdf [file d3ta06607j1.pdf]

Electronic Supplementary Information

**BeN<sub>4</sub> Nanoribbon-Based 3D Porous Metallic and Ductile Monolith for High-Performance Sodium-Ion Battery Anode**

Wei Sun, Qian Wang \*

School of Materials Science and Engineering, CAPT, Peking University, Beijing 100871, China. \* Author to whom any correspondence should be addressed: [qianwang2@pku.edu.cn](mailto:qianwang2@pku.edu.cn)

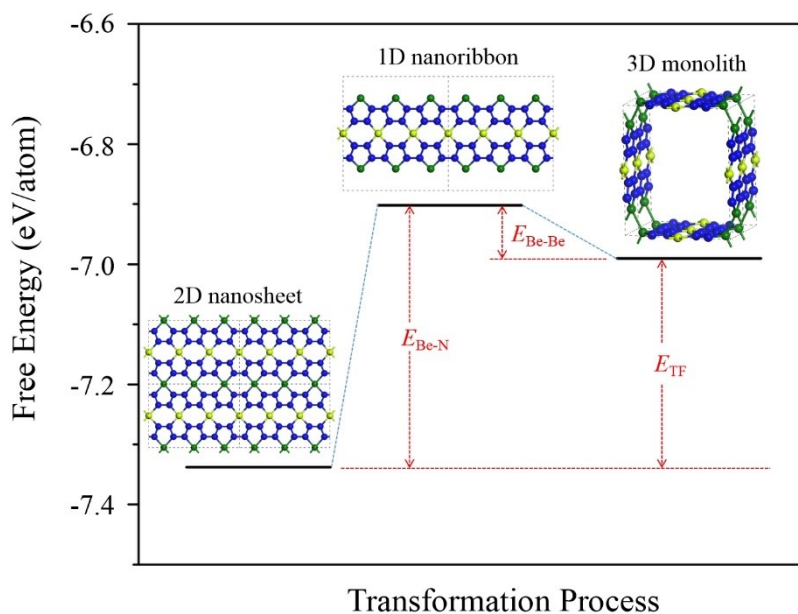

**Fig. S1.** Energetics for the evolution from the 2D BeN<sub>4</sub> sheet to the 1D nanoribbon, and to the 3D monolith.

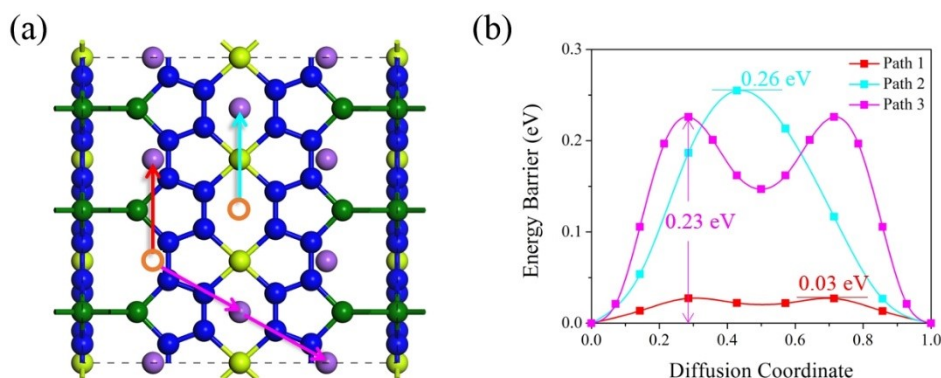

**Fig. S2.** (a) Three nonequivalent diffusion pathways for a single vacancy (orange circle), and (b) the corresponding energy barrier profiles.
